# Supplementary material for: Enhanced stability and stacking dependent magnetic/electronic properties of 2D monolayer FeTiO3 on a Ti2CO2 substrate
Source: Royal Society of Chemistry journal article supplement (doi:10.1039/c9tc04979g), 2019-01-01
Supplement: c9tc04979g1.pdf [file c9tc04979g1.pdf]

## Supporting Information

### Enhanced stability and stacked dependent magnetic/electronic properties of 2D monolayer FeTiO<sub>3</sub> on Ti<sub>2</sub>CO<sub>2</sub> substrate

Cui Jin<sup>1,2</sup>, Jing Shang<sup>2</sup>, Xiao Tang<sup>2</sup>, Xin Tan<sup>3</sup>, Sean C. Smith<sup>3</sup>, Chengwang Niu<sup>1</sup>, Ying Dai<sup>1\*</sup>, Liangzhi Kou<sup>2\*</sup>

<sup>1</sup>*School of Physics, State Key Laboratory of Crystal Materials, Shandong University, Jinan 250100, China*

<sup>2</sup>*School of Chemistry, Physics and Mechanical Engineering Faculty, Queensland University of Technology, Gardens Point Campus, QLD 4001, Brisbane, Australia*

<sup>3</sup>*Department of Applied Mathematics, Research School of Physics and Engineering, Australian National University, Canberra 2601, Australia*

[daiy60@sina.com](mailto:daiy60@sina.com)

[Liangzhi.kou@qut.edu.au](mailto:Liangzhi.kou@qut.edu.au)

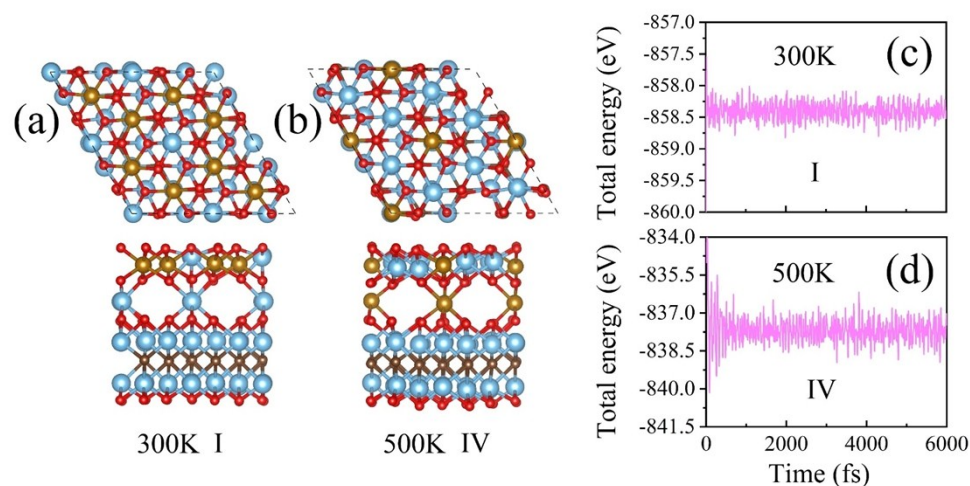

**Fig. S1** Left panel: structural snapshots for 2 × 2 FeTiO<sub>3</sub>/Ti<sub>2</sub>CO<sub>2</sub> (100 atoms) configuration I (a) at 300 K, and configuration IV (b) at 500 K within 6 ps during AIMD simulation; Right panel: variation of the total energy for configuration I (c) and configuration IV (d) at time of 6 ps along AIMD simulation under the temperatures of 300 K and 500K, respectively.

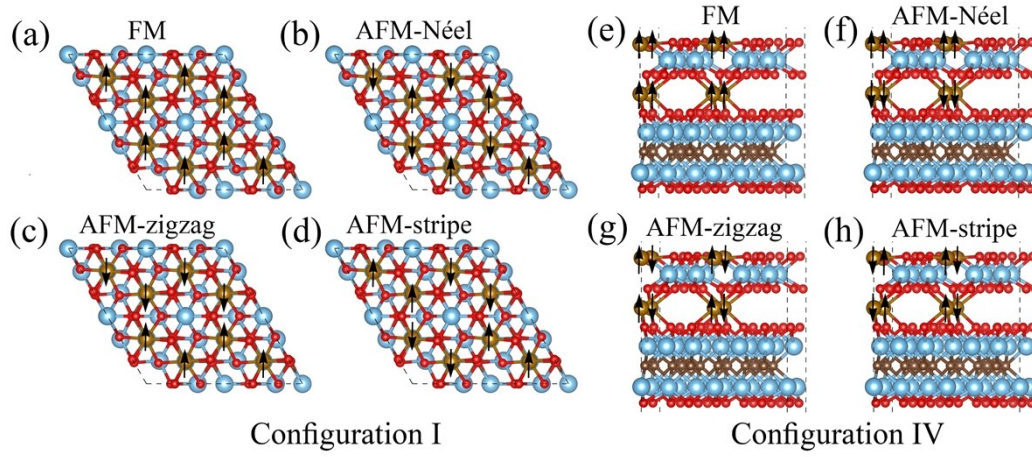

**Fig. S2** Left panel: top view of the FM (a), and various AFM spin configurations: AFM-Néel (b), AFM-zigzag (c), AFM-stripe (d) of configuration I with  $2 \times 2$  supercell. Right panel: the side view of the FM (a), AFM-Néel (b), AFM-zigzag (c), and AFM-stripe (d) of configuration IV with  $2 \times 2$  supercell. Blue, gray, red and brown balls are Ti, C, O and Fe atoms, respectively. Up and down arrows denote the spin-up and down polarization of Fe atoms, respectively.

**Tab. S1** The relative energies per unit cell ( $E_{\text{ex}}$ , in eV) between ferromagnetic (FM), three antiferromagnetic (AFM-Néel, AFM-zigzag, and AFM-stripe) states for 2D  $\text{FeTiO}_3/\text{Ti}_2\text{CO}_2$  heterostructure with  $2 \times 2$  supercell. Ground states are highlighted with yellow.

| Configuration | FM | AFM-Néel | AFM-zigzag | AFM-stripe |
|---------------|----|----------|------------|------------|
| I             | 0  | -0.15    | -0.09      | -0.13      |
| II            | 0  | 0.24     | 0.01       | 0.02       |
| III           | 0  | -0.07    | -0.03      | -0.05      |
| IV            | 0  | 0.01     | 0.10       | 0.04       |
| V             | 0  | -0.01    | -0.02      | 0.07       |
| VI            | 0  | -0.02    | -0.01      | -0.03      |

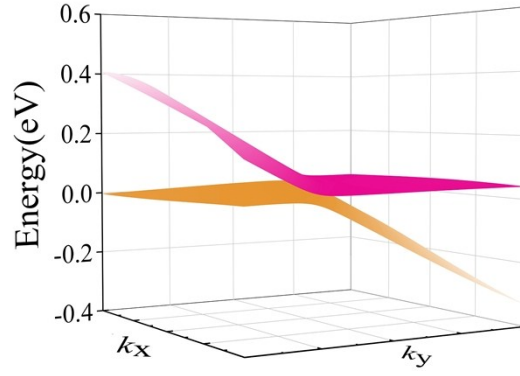

**Fig. S3** The 3D band structure around the Fermi level of 2D FeTiO<sub>3</sub>/Ti<sub>2</sub>CO<sub>2</sub> configuration IV along the M-G direction in the Brillouin zone.

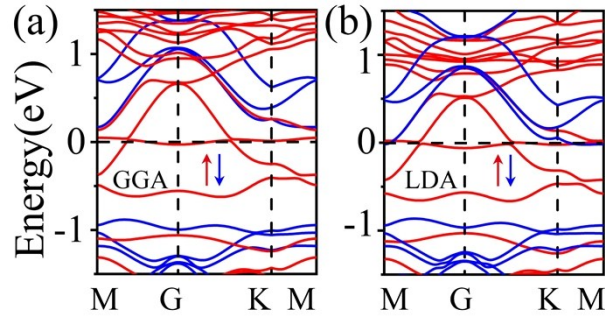

**Fig. S4** Spin-polarized band structures of 2D FeTiO<sub>3</sub>/Ti<sub>2</sub>CO<sub>2</sub> configuration IV with the (a) GGA+U method, and (b) LDA+U method. Red and blue lines (arrows) denote spin-up and spin-down bands, respectively. Dashed lines refer to the Fermi level set to zero.
